# Supplementary material for: The synthesis and evaluation of novel ALK inhibitors containing the sulfoxide structure
Source: Royal Society of Chemistry journal article supplement (doi:10.1039/d4ra01556h), 2024-01-01

**ALK Replicate 1 and cropped for Fig.5**

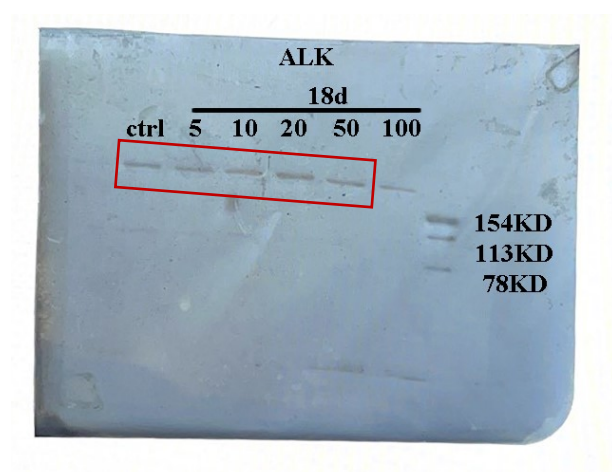

**ALK Replicate 2**

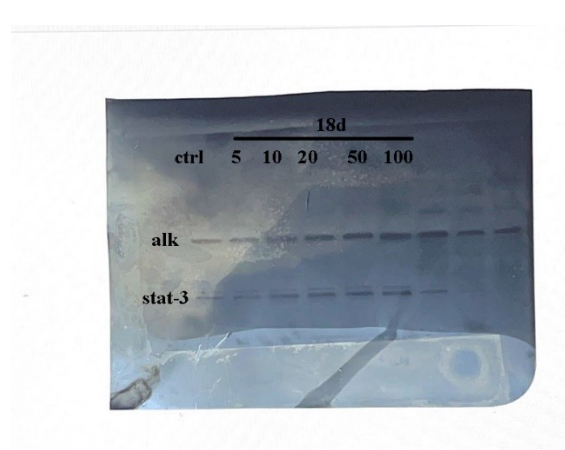

**ALK Replicate 3**

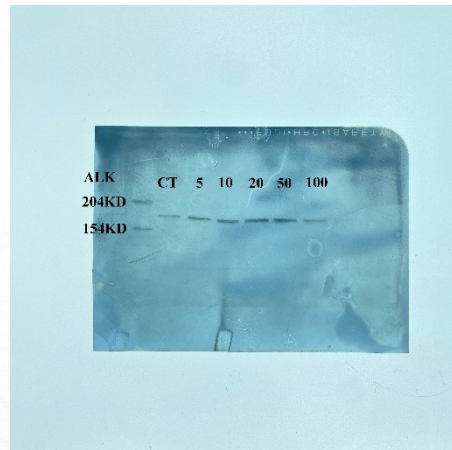

**p-ALK Replicate 1 and cropped for Fig.5**

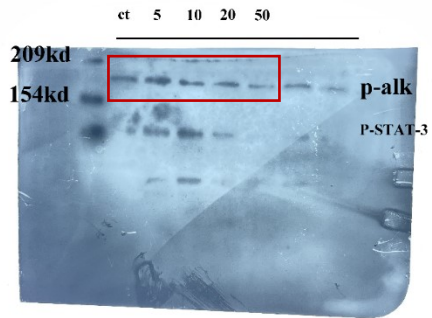

**p-ALK Replicate 2**

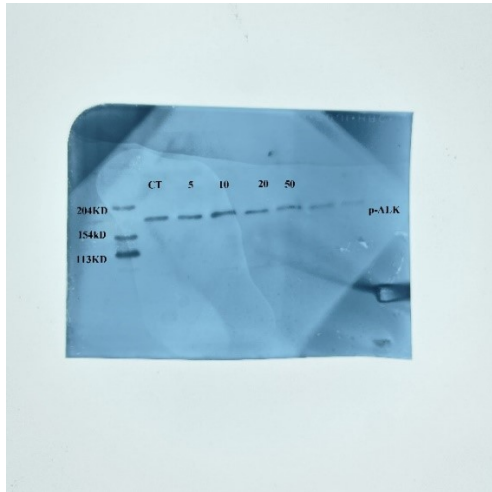

**p-ALK Replicate 3**

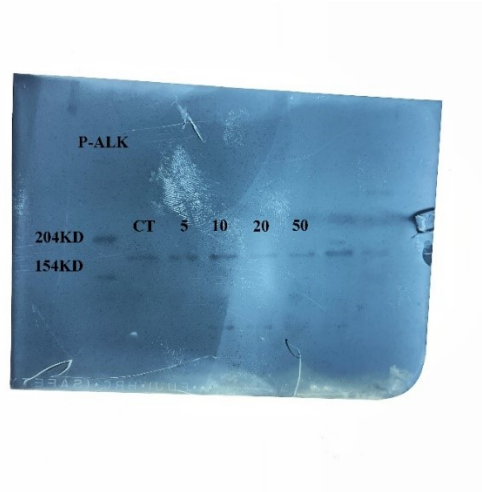

**STAT-3 Replicate 1 and cropped for Fig.5**

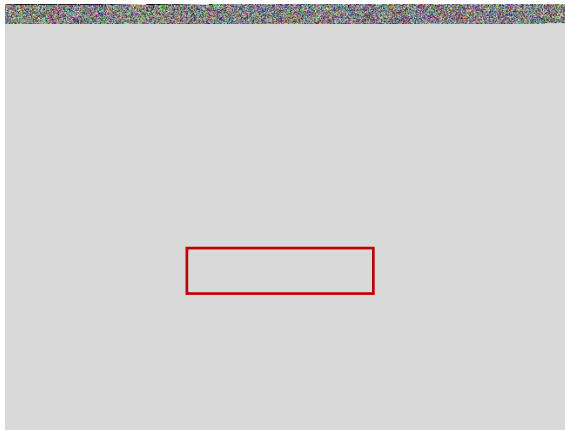

**STAT-3 Replicate 2**

**STAT-3 Replicate 3**

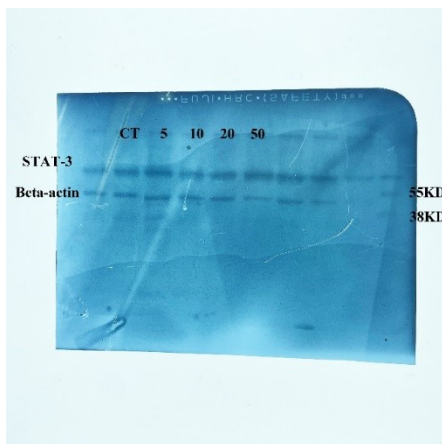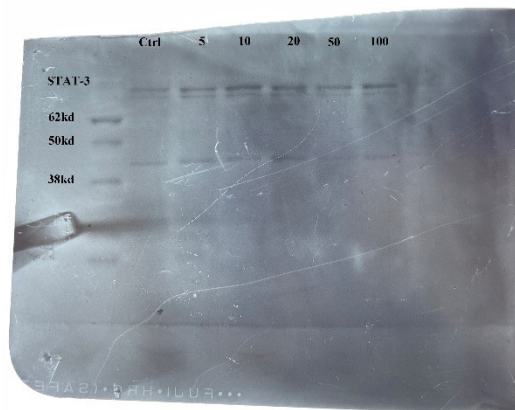

**p-STAT-3 Replicate 1 and cropped for Fig.5**

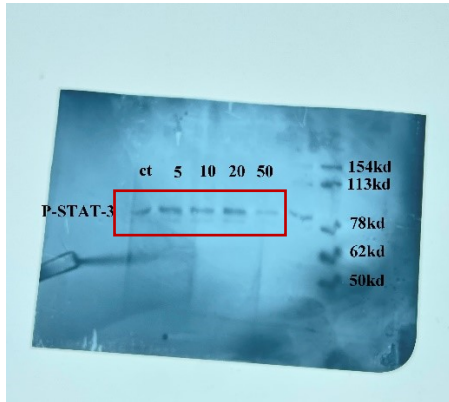

**p-STAT-3 Replicate 2**

**p-STAT-3 Replicate 3**

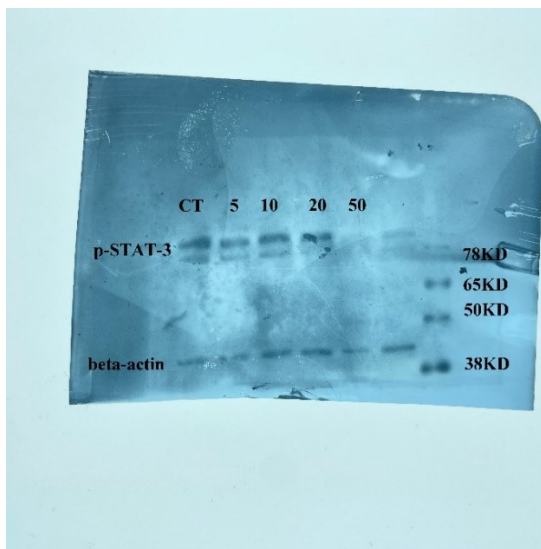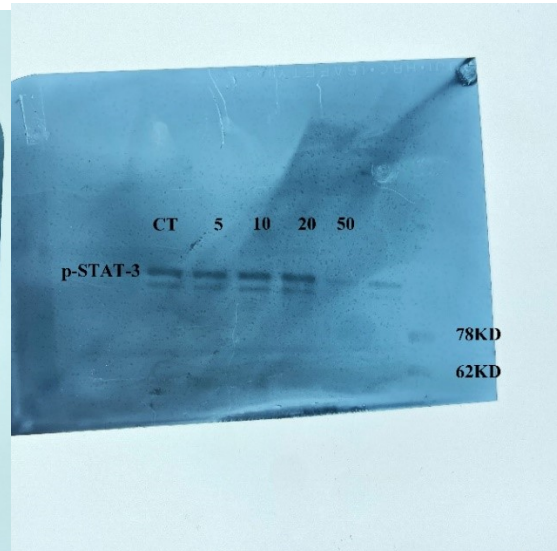

**$\beta$ -actin Replicate 1 and cropped for Fig.5**

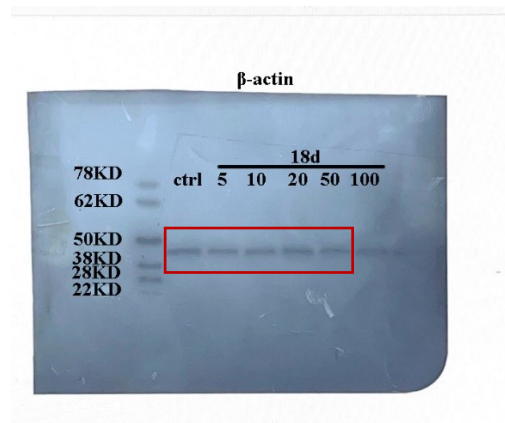

**$\beta$ -actin Replicate 2**

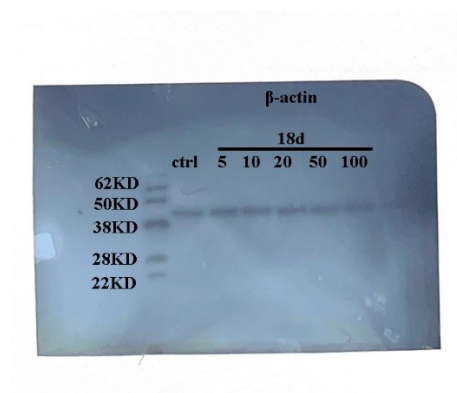

**$\beta$ -actin Replicate 3**

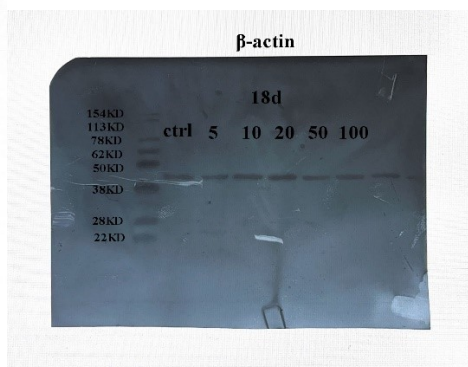

Supplement: d4ra01556h2.pdf [file d4ra01556h2.pdf]
